# Supplementary material
Source: publisher figshare collection journal article supplement (https://acs.figshare.com/ndownloader/files/21678042)
Supplement: Supplementary file 1 [file 21678042]

# **Developing Cu-MOR@SiO<sub>2</sub> Core–Shell Catalyst Microcapsules for Two-Stage Ethanol Direct Synthesis from DME and Syngas**

Ce Du<sup>a,c†</sup>, Emmerson Hondo<sup>a†</sup>, Linet Gapu Chizema<sup>a</sup>, Chengwei Wang<sup>a</sup>, Mingliang Tong<sup>a</sup>,  
Chuang Xing<sup>a,b</sup>, Ruiqin Yang<sup>a,b</sup>, Peng Lu<sup>a,b,\*</sup>, Noritatsu Tsubaki<sup>c,\*</sup>

*a Zhejiang University of Science and Technology, Hangzhou 310023, PR China*

*b Zhejiang Provincial Key Lab for Chem. & Bio. Processing Technology of Farm Product, Hangzhou 310023, PR China*

*c Department of Applied Chemistry, School of Engineering, University of Toyama, Gofuku 3190, Toyama 930-8555, Japan*

<sup>†</sup>Ce Du and Emmerson Hondo contributed equally.

\*Corresponding authors

Email: lvpeng0830@zust.edu.cn (P. Lu)

Email: tsubaki@eng.u-toyama.ac.jp (N. Tsubaki)

## Supporting Information

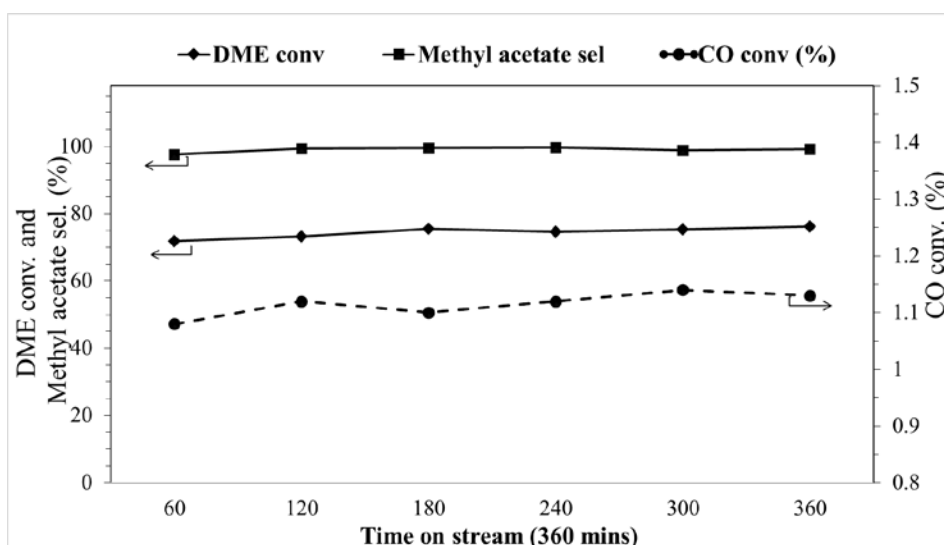

**Figure S1.** Reaction cond.: pressure = 1.5 MPa, temperature = 220 °C, mass (Cu-MOR@SiO<sub>2</sub>) = 0.5 g, gas flow = 45 mL/min, gas mixture: Ar/DME/CO/H<sub>2</sub> = 1.01:2.01:49.50:47.48, TOS = 360 mins.

Single stage DME carbonylation over Cu-MOR@SiO<sub>2</sub> catalyst, Figure S1, was conducted to verify the intermediate product (generated MA) and the influence of side reactions on both catalyst performance and product formation.

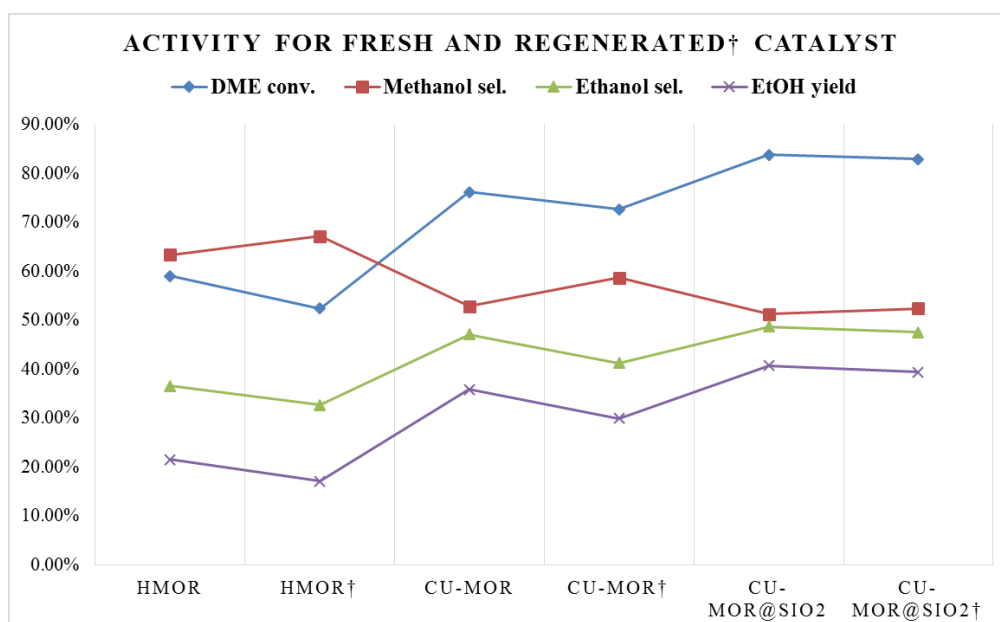

**Figure S2.** Reaction cond.: pressure = 1.5 MPa, temperature = 220 °C, mass (HMOR/Cu-MOR/Cu-MOR@SiO<sub>2</sub>) = 0.5 g, mass (CZA) = 0.5 g, gas flow = 45 mL/min, gas mixture: Ar/DME/CO/H<sub>2</sub> = 1.01:2.01:49.50:47.48, TOS = 360 mins, †Regenerated catalyst.

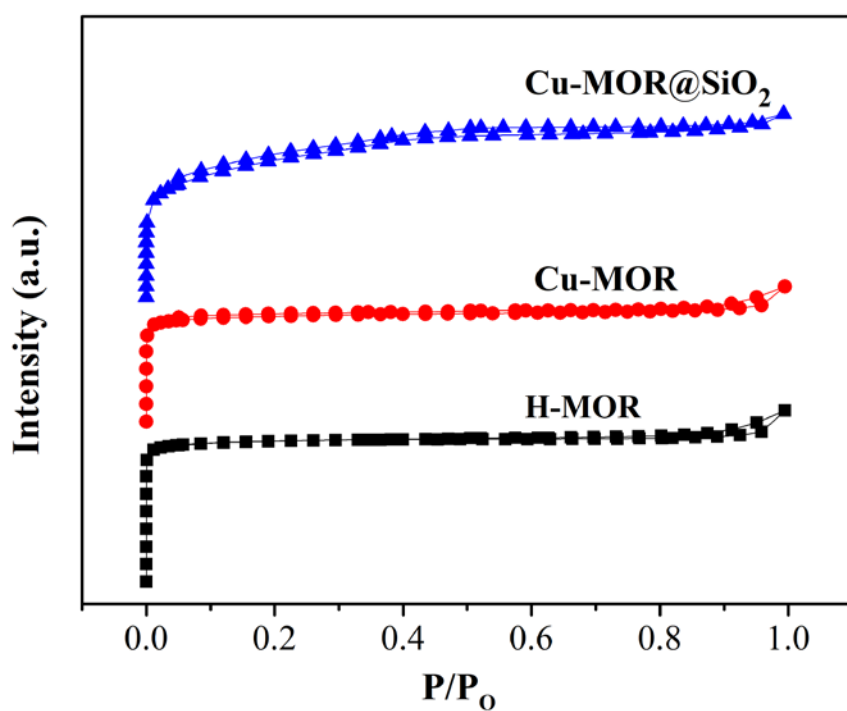

**Figure S3.** N<sub>2</sub> sorption isotherms for HMOR, Cu-MOR and Cu-MOR@SiO<sub>2</sub> catalysts.

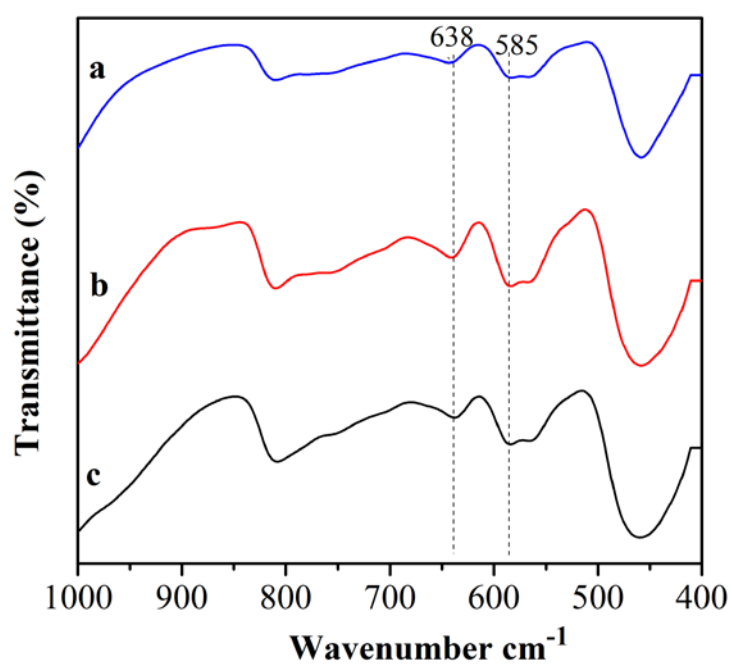

**Figure S4.** FTIR spectra for **a.** HMOR, **b.** Cu-MOR and **c.** Cu-MOR@SiO<sub>2</sub> catalysts

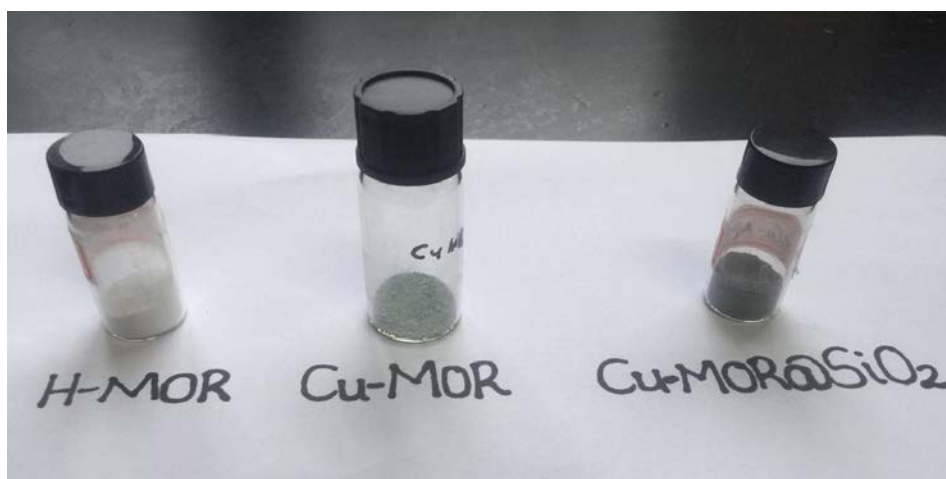

**Figure S5.** Images of the as-prepared catalyst samples.

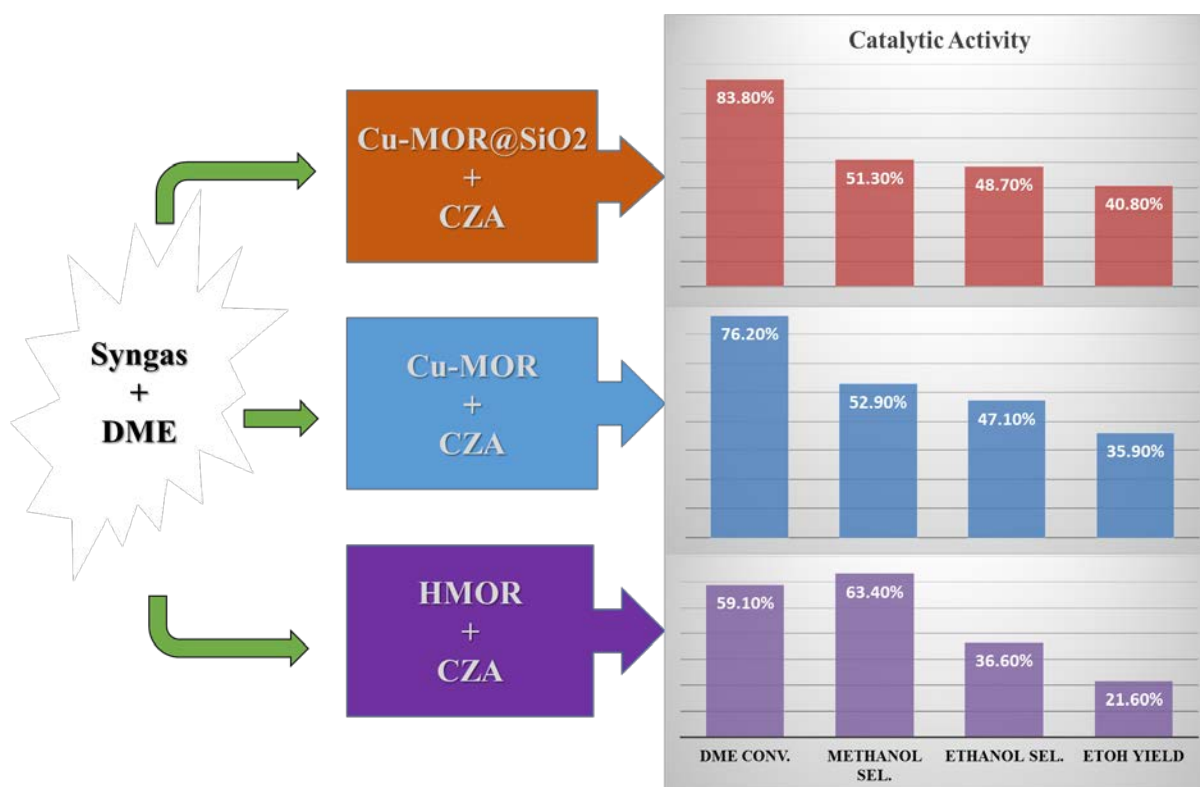

**Figure S6.** A summary of catalytic activity over the series reactions.

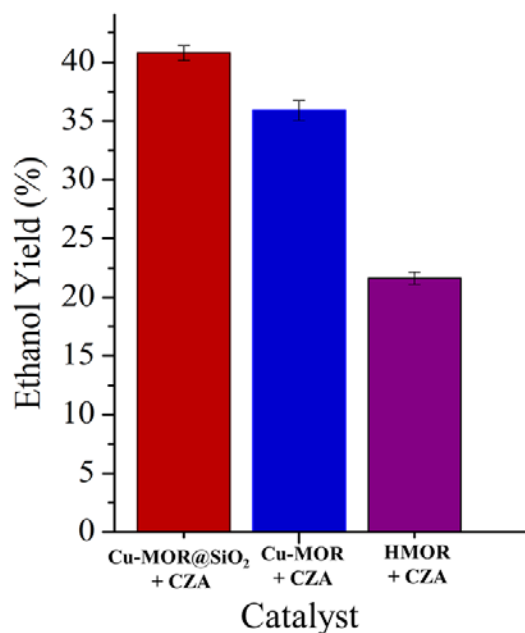

**Figure S7.** Relative errors represented with error bars.

The experiments for the as-prepared catalysts were conducted for three times, and the results were averaged. The estimated errors are shown in Figure S7 above.

**Table S1.** BET Surface Area and Total Pore Volume

| Catalyst                | BET surface area/(m <sup>2</sup> ·g <sup>-1</sup> ) |                    |                   | Pore Volume/(cm <sup>3</sup> ·g <sup>-1</sup> ) |                   |                    |
|-------------------------|-----------------------------------------------------|--------------------|-------------------|-------------------------------------------------|-------------------|--------------------|
|                         | Total <sup>a</sup>                                  | Micro <sup>b</sup> | Meso <sup>c</sup> | Total <sup>d</sup>                              | Meso <sup>e</sup> | Micro <sup>f</sup> |
| Cu-MOR@SiO <sub>2</sub> | 405                                                 | 242                | 163               | 0.245                                           | 0.121             | 0.088              |
| Cu-MOR                  | 317                                                 | 283                | 34                | 0.186                                           | 0.044             | 0.147              |
| H-MOR                   | 406                                                 | 374                | 32                | 0.232                                           | 0.048             | 0.194              |

<sup>a</sup> BET<sub>total</sub> (Micro<sup>b</sup> + Meso<sup>c</sup>)

<sup>b</sup> Micropore (by t-plot)

<sup>c</sup> Mesopore ( $S_{\text{Total}} = S_{\text{Micro}} + S_{\text{Meso}}$ )

<sup>d</sup> Total pore vol. @  $P/P_0 = 0.95$

<sup>e</sup> Mesopore vol. @  $P/P_0=0.95$  (BJH method)

<sup>f</sup> Micropore vol. (by t-plot)

## H<sub>2</sub>-TPR and NH<sub>3</sub>-TPD

H<sub>2</sub>-TPR was conducted for analyzing the redox behaviour, through hydrogen consumption of the catalyst using a BELCAT-B3 (BEL, Japan) apparatus, furnished with a

thermal conductivity detector (TCD). Prior reduction, the sample (20 mg) was perfectly inserted in a U-tube quartz reactor, then pre-treated under flowing Argon ( $30 \text{ mL} \cdot \text{min}^{-1}$ ) at  $200 \text{ }^{\circ}\text{C}$  for 1 h before being cooled to  $100 \text{ }^{\circ}\text{C}$ . Reduction gas,  $\text{H}_2/\text{Ar}$  (10%,  $30 \text{ mL} \cdot \text{min}^{-1}$ ) was fed, at the same time heating from  $100$  to  $650 \text{ }^{\circ}\text{C}$  at heat rate of  $10 \text{ }^{\circ}\text{C} \cdot \text{min}^{-1}$ .

For  $\text{NH}_3$ -TPD, the same machine was used but differentiating the parameters. Firstly, the catalyst was purified for 1 h at  $200 \text{ }^{\circ}\text{C}$  under flowing Helium ( $30 \text{ mL} \cdot \text{min}^{-1}$ ) then cooled to  $100 \text{ }^{\circ}\text{C}$ .  $\text{NH}_3$  adsorption was carried out at this temperature for 1 h. Helium ( $30 \text{ mL} \cdot \text{min}^{-1}$ ) was then re-introduced under steady flow to physically desorb  $\text{NH}_3$  for another 1 h. The sample was then heated to  $650 \text{ }^{\circ}\text{C}$  at heat rate of  $10 \text{ }^{\circ}\text{C} \cdot \text{min}^{-1}$ . The discharge gas was analyzed online by a thermal conductivity detector (TCD).
